# Supplementary material for: Evidence of Mercury Methylation and Demethylation by the Estuarine Microbial Communities Obtained in Stable Hg Isotope Studies
Source: MDPI journal article supplement (doi:10.3390/ijerph15102141), 2018-09-29
Supplement: s1 [file s1]

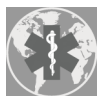

**Table S1.** Isolates identified among the three studied communities. The identifications were based on 16S rRNA amplification and sequencing.

| Microbial communities             | Sampled areas                                                                                                                                                                        |                                                                                                                                                                                                        |
|-----------------------------------|--------------------------------------------------------------------------------------------------------------------------------------------------------------------------------------|--------------------------------------------------------------------------------------------------------------------------------------------------------------------------------------------------------|
|                                   | Cala do Norte                                                                                                                                                                        | Barreiro                                                                                                                                                                                               |
| AMC <sup>a1</sup>                 | <i>Bacillus</i> ( <i>B. cereus</i> and <i>B. subtilis</i> )<br><i>Serratia marcescens</i><br><i>Citrobacter freundii</i><br><i>Pseudomonas putida</i><br><i>Vibrio metschnikovii</i> | <i>Bacillus</i> ( <i>B. megaterium</i> , <i>B. cereus</i> , <i>B. subtilis</i> , and <i>B. soli</i> )<br><i>Vibrio</i> ( <i>V. metschnikovii</i> and <i>V. fluvialis</i> )<br><i>Aeromonas media</i> ) |
| AnMC <sup>a</sup>                 | <i>Clostridium</i> spp.<br><i>Clostridium difficile</i><br><i>Enterobacteriaceae</i><br><i>bacterium</i>                                                                             | <i>Enterobacteriaceae</i><br><i>bacterium</i>                                                                                                                                                          |
| SO <sub>4</sub> -RMC <sup>a</sup> | <i>Desulfovibrio desulfuricans</i>                                                                                                                                                   | <i>Desulfovibrio desulfuricans</i>                                                                                                                                                                     |

<sup>(a)</sup> AMC: aerobic microbial community, AnMC: anaerobic microbial community, and SO<sub>4</sub>-RMC: sulfate-reducing microbial community.

<sup>1</sup> Part of these data were published in Figueiredo et al. [25].
